# Supplementary material
Source: PubMed Central journal article supplement (PMC8263334)

**Figure S1.** Flow diagram of study identification, extraction of exposure parameters, effect size estimation and quality score process.

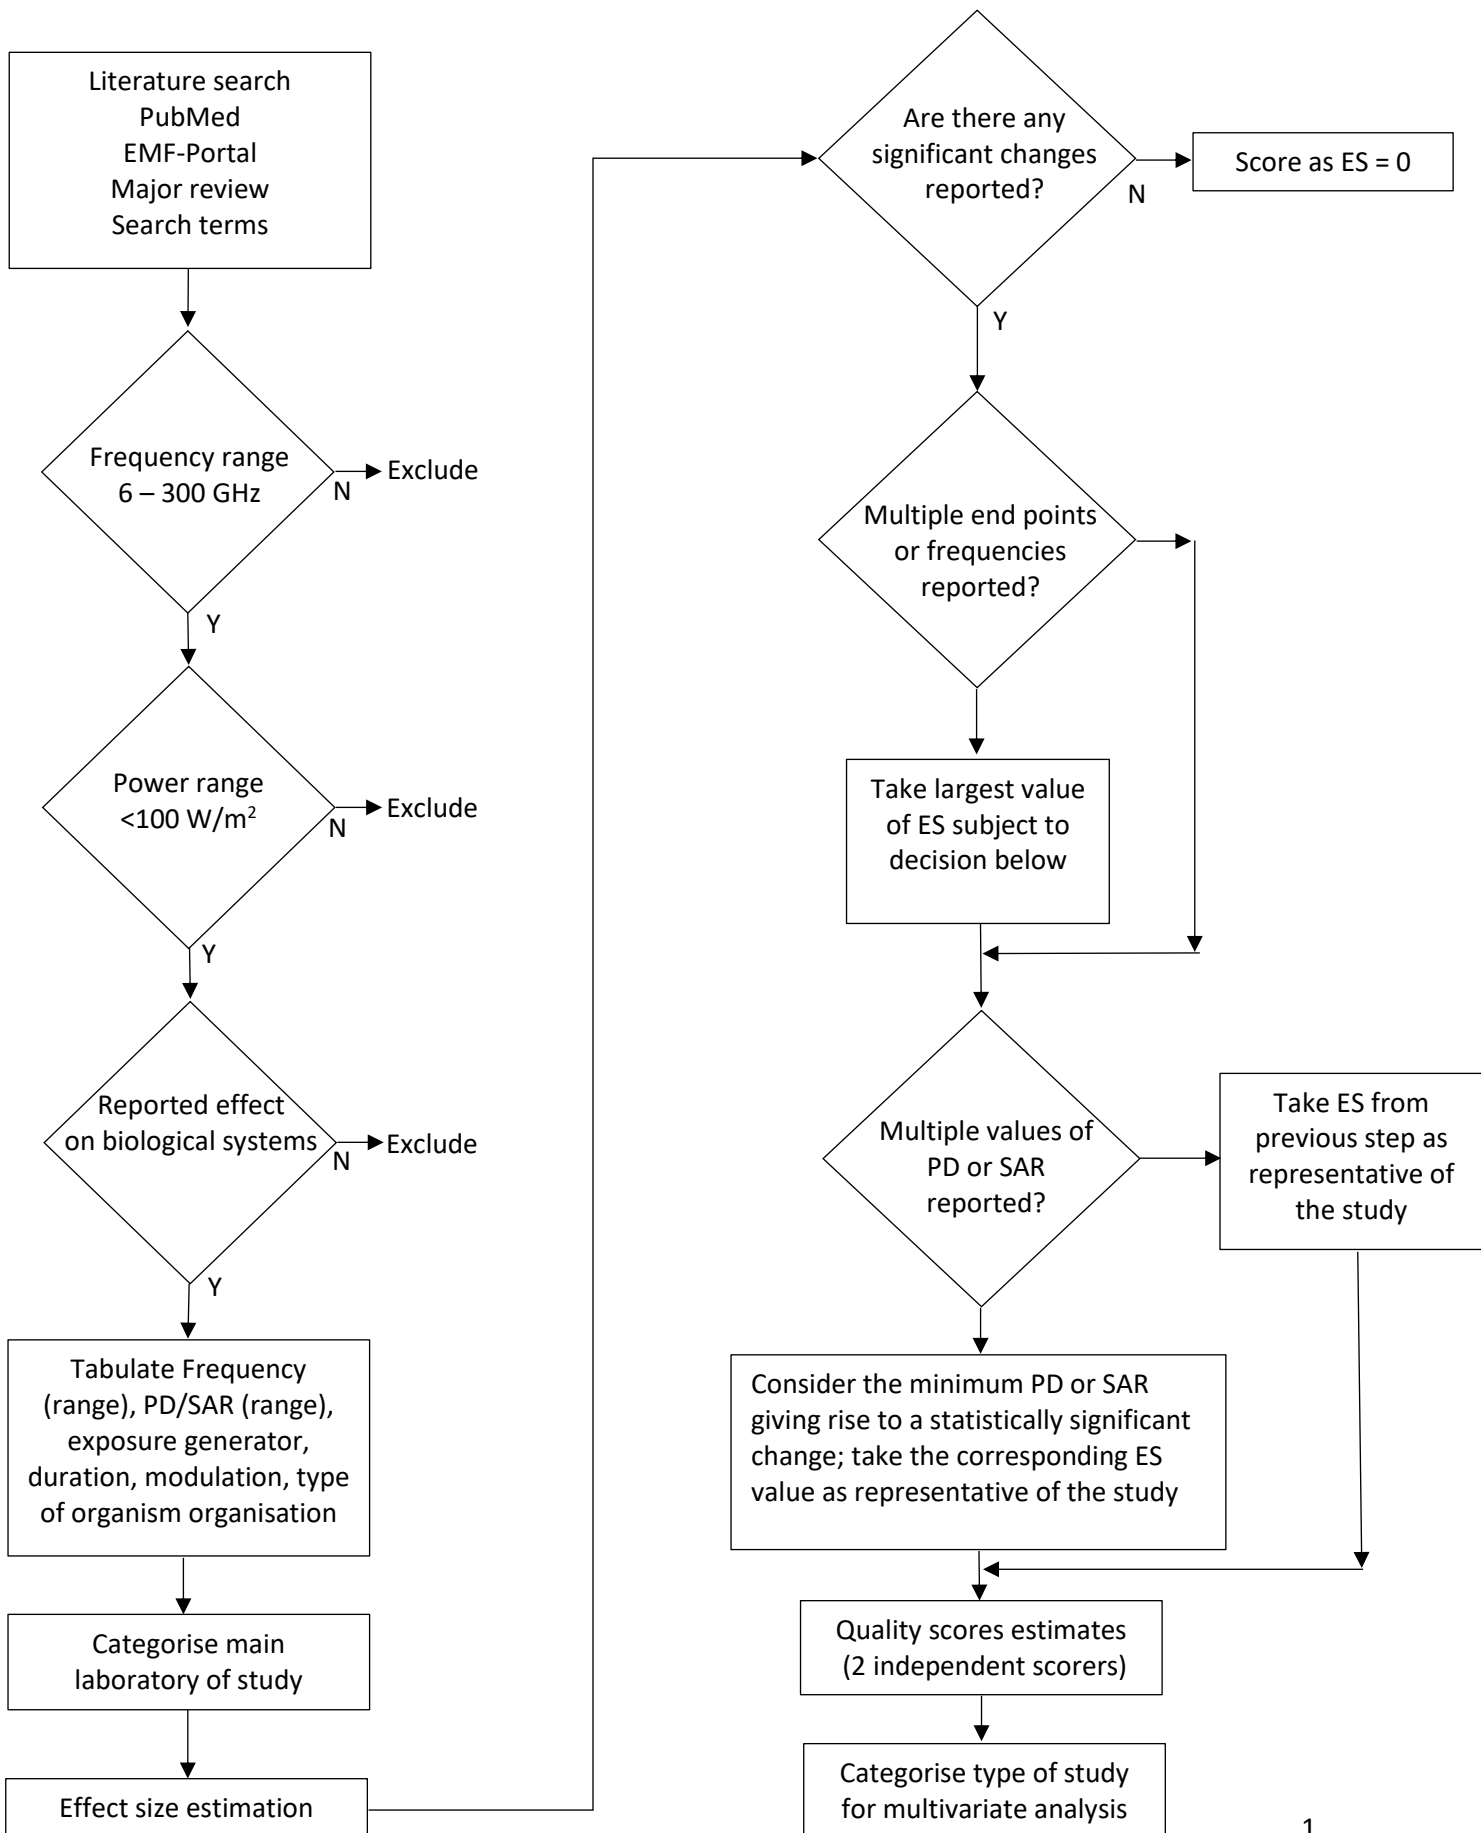

Supplement: 41370_2021_307_MOESM1_ESM.pdf [file 41370_2021_307_MOESM1_ESM.pdf]
