# Supplementary material
Source: PubMed Central journal article supplement (PMC8263334)
Supplement: 41370_2021_307_MOESM2_ESM.pdf [file 41370_2021_307_MOESM2_ESM.pdf]

**Table S1.** List of studies included in meta-analysis (n = 88). Of the 107 papers considered in the companion paper to this one, 19 were excluded, for reasons summarised in this paper. These studies are listed at the end of this Table.

| <b>Authors, year</b>                     | <b>Country</b> | <b>Frequency (GHz)</b> | <b>Intensity (W/m<sup>2</sup>)</b> | <b>SAR (W/kg)</b> | <b>Effect size</b> |
|------------------------------------------|----------------|------------------------|------------------------------------|-------------------|--------------------|
| <i>Badzhinyan et al (2000) [1]</i>       | <i>Armenia</i> | 40                     | 100                                |                   | 2                  |
| <i>Bellossi et al (2000) [2]</i>         | <i>Japan</i>   | 60                     | 5                                  |                   | 0.8                |
| <i>Belyaev and Kravchenko (1994) [3]</i> | <i>Russia</i>  | 41.6                   | 1.00E-05                           |                   | 4                  |
| <i>Belyaev et al (1992) [4]</i>          | <i>Russia</i>  | 51.7                   | 0.01                               | 6                 | 4                  |
| <i>Belyaev et al (1992) [5]</i>          | <i>Russia</i>  | 51.7                   | 1                                  | 0.6               | 4                  |
| <i>Belyaev et al (1992) [6]</i>          | <i>Russia</i>  | 51.6                   | 1                                  |                   | 10                 |
| <i>Belyaev et al (1993) [7]</i>          | <i>Russia</i>  | 41.3                   | 1.00E-08                           |                   | 4                  |
| <i>Belyaev et al (1993) [8]</i>          | <i>Russia</i>  | 41.3                   | 1                                  |                   | 8                  |
| <i>Belyaev et al (1994) [9]</i>          | <i>Russia</i>  | 51.8                   | 1.00E-15                           |                   | 20                 |
| <i>Belyaev et al (1996) [10]</i>         | <i>Russia</i>  | 51.7                   | 1.00E-14                           |                   | 4                  |
| <i>Beneduci (2009) [11]</i>              | <i>Italy</i>   | 42.2                   | 1.1                                |                   | 0                  |
| <i>Beneduci et al (2005) [12]</i>        | <i>Italy</i>   | 51.1                   |                                    |                   | 2.5                |
| <i>Beneduci et al (2007) [13]</i>        | <i>Italy</i>   | 53.6                   | 0.01                               |                   | 30                 |
| <i>Beneduci et al (2012) [14]</i>        | <i>Italy</i>   | 53.6                   |                                    | 0.002             | 2.5                |
| <i>Beneduci et al (2013) [15]</i>        | <i>Italy</i>   | 53.4                   | 0.1                                | 0.002             | 5                  |
| <i>Beneduci et al (2014) [16]</i>        | <i>Italy</i>   | 78                     | 0.03                               | 0.025             | 5                  |
| <i>Chen et al (2004) [17]</i>            | <i>China</i>   | 30.2                   | 10                                 |                   | 0.25               |
| <i>Cohen et al (2009) [18]</i>           | <i>Israel</i>  | 99                     | 2.00E+00                           | 283               | 1.2                |
| <i>Cosentino et al (2013) [19]</i>       | <i>Italy</i>   | 52                     | 0.04                               |                   | 0.8                |
| <i>Crouzier et al (2009) [20]</i>        | <i>India</i>   | 9.71                   |                                    | 8                 | 3                  |
| <i>D'Agostino et al (2018) [21]</i>      | <i>Italy</i>   | 53.37                  |                                    | 1.1               | 2.3                |
| <i>De Amicis et al (2015) [22]</i>       | <i>Italy</i>   | 100                    | 4                                  | 20                | 2                  |
| <i>Deghoyan et al (2012) [23]</i>        | <i>Armenia</i> | 90                     |                                    | 1.5               | 2                  |
| <i>Di Donato et al (2012) [24]</i>       | <i>Italy</i>   | 53.37                  | 1                                  | 0.3               | 3.4                |
| <i>Franchini et al (2018) [25]</i>       | <i>Italy</i>   | 25                     | 8                                  | 20                | 1                  |
| <i>Furia et al (1986) [26]</i>           | <i>US</i>      | 41.7                   |                                    |                   | 0                  |
| <i>Gandhi et al (1980) [27]</i>          | <i>US</i>      | 50                     | 37                                 |                   | 0                  |
| <i>Gapeyev and Lukyanova (2015) [28]</i> | <i>Russia</i>  | 42.2                   | 1                                  | 1.50E+00          | 1.8                |
| <i>Gapeyev et al (1997) [29]</i>         | <i>Russia</i>  | 42                     | 1.00E-03                           |                   | 0.75               |
| <i>Gapeyev et al (1998) [30]</i>         | <i>Russia</i>  | 42                     | 1.5                                |                   | 0.9                |
| <i>Gapeyev et al (2011) [31]</i>         | <i>Russia</i>  | 42.2                   | 1                                  | 1.5               | 3                  |
| <i>Gapeyev et al (2013) [32]</i>         | <i>Russia</i>  | 42.2                   | 1                                  | 1.5               | 3                  |
| <i>Gapeyev et al (2014) [33]</i>         | <i>Russia</i>  | 42.2                   | 1                                  | 1.5               | 1.3                |
| <i>Garaj-Vrhovac et al (1991) [34]</i>   | <i>Croatia</i> | 7.7                    | 5                                  |                   | 3.6                |
| <i>Garaj-Vrhovac et al (1992) [35]</i>   | <i>Croatia</i> | 7.7                    | 5                                  |                   | 0                  |

|                                            |                    |       |          |          |      |
|--------------------------------------------|--------------------|-------|----------|----------|------|
| <i>Geletyuk et al (1995) [36]</i>          | <i>Russia</i>      | 42.25 | 1        |          | 1.3  |
| <i>Gos et al (1997) [37]</i>               | <i>Switzerland</i> | 40    | 0.5      | 1        | 0    |
| <i>Grundler and Keilmann (1983) [38]</i>   | <i>France</i>      | 42    | 1.00E+02 |          | 3    |
| <i>Hintzsche et al (2011) [39]</i>         | <i>Germany</i>     | 106   | 43       |          | 4    |
| <i>Hintzsche et al (2012) [40]</i>         | <i>Germany</i>     | 107   | 20       | 13       | 0    |
| <i>Homenko et al (2009) [41]</i>           | <i>Israel</i>      | 100   | 0.08     |          | 0.4  |
| <i>Hovnanyan et al (2017) [42]</i>         | <i>Armenia</i>     | 51.8  | 0.6      |          | 12   |
| <i>Kesari and Behari (2010) [43]</i>       | <i>India</i>       | 50    | 0.0086   | 8.00E-04 | 2    |
| <i>Kesari and Behari (2009) [44]</i>       | <i>India</i>       | 50    | 0.0086   | 8.00E-04 | 4    |
| <i>Korenstein-Ilan et al (2008) [45]</i>   | <i>Israel</i>      | 100   | 0.3      | 2.4      | 5    |
| <i>Koyama et al (2016) [46]</i>            | <i>Japan</i>       | 60    | 10       |          | 0    |
| <i>Koyama et al (2019) [47]</i>            | <i>Japan</i>       | 40    | 10       |          | 0    |
| <i>Kumar et al (2010) [48]</i>             | <i>India</i>       | 50    | 0.0086   | 8.00E-04 | 18   |
| <i>Kumar et al (2011) [49]</i>             | <i>India</i>       | 10    | 2.1      | 0.014    | 2    |
| <i>Le Quement et al (2012) [50]</i>        | <i>France</i>      | 60    | 18       | 4.24E+01 | 15   |
| <i>Lukashevsky and Belyaev (1990) [51]</i> | <i>Russia</i>      | 70    | 1        | 0.8      | 2    |
| <i>Minasyan et al (2007) [52]</i>          | <i>Armenia</i>     | 42.2  | 3        |          | 0.7  |
| <i>Muller et al (2004) [53]</i>            | <i>Germany</i>     | 77    | 0.03     |          | 0    |
| <i>Munemori and Ikeda (1982) [54]</i>      | <i>Japan</i>       | 9.4   | 2.5      |          | 0.3  |
| <i>Munemori and Ikeda (1984) [55]</i>      | <i>Japan</i>       | 10    | 7        |          | 0.5  |
| <i>Nicolaz et al (2008) [56]</i>           | <i>France</i>      | 60.4  | 1.4      |          | 0    |
| <i>Nicolaz et al (2009) [57]</i>           | <i>France</i>      | 59.2  | 1.4      | 3        | 0    |
| <i>Olchowik and Maj (2000) [58]</i>        | <i>Poland</i>      | 53.57 | 10       |          | 2.7  |
| <i>Pakhomova et al (1997) [59]</i>         | <i>US</i>          | 61.3  | 1.3      | 4        | 1.1  |
| <i>Pakhomov et al (1997) [60]</i>          | <i>US</i>          | 40    | 30       |          | 1.5  |
| <i>Pakhomov et al, (1997) [61]</i>         | <i>US</i>          | 41.5  | 2.5      |          | 4.6  |
| <i>Pakhomov et al (1997) [62]</i>          | <i>US</i>          | 41.3  | 0.2      |          | 1    |
| <i>Paulraj and Behari (2006) [63]</i>      | <i>India</i>       | 10    | 10       | 2        | 3    |
| <i>Pikov et al (2010) [64]</i>             | <i>US</i>          | 60    | 0.01     |          | 2    |
| <i>Pikov and Siegel (2011) [65]</i>        | <i>US</i>          | 60    | 2        |          | 2    |
| <i>Ramundo-Orlando et al (2009) [66]</i>   | <i>Italy</i>       | 53.37 | 1        | 0.5      | 3    |
| <i>Rojavin and Ziskin (1995) [67]</i>      | <i>US</i>          | 61    | 10       | 84       | 0.75 |
| <i>Romanenko et al (2014) [68]</i>         | <i>US</i>          | 60    | 10       |          | 1    |

|                                               |                  |       |          |      |     |
|-----------------------------------------------|------------------|-------|----------|------|-----|
| <i>Rotkovská et al (1993) [69]</i>            | <i>Czech Rep</i> | 34    | 0.2      |      | 1.8 |
| <i>Safronova et al (2002) [70]</i>            | <i>Russia</i>    | 42.2  | 0.2      | 0.45 | 1   |
| <i>Sarapultseva et al (2014) [71]</i>         | <i>Russia</i>    | 10    | 0.1      |      | 1.6 |
| <i>Shcheglov et al (1997) [72]</i>            | <i>Russia</i>    | 51.5  | 1.00E-13 |      | 4   |
| <i>Shcheglov et al (2002) [73]</i>            | <i>Russia</i>    | 51.5  | 1.00E-13 |      | 6   |
| <i>Shckorbatov et al (1998) [74]</i>          | <i>Ukraine</i>   | 42    | 2        |      | 3   |
| <i>Shckorbatov et al (2002) [75]</i>          | <i>Ukraine</i>   | 8.75  | 2        |      | 1.3 |
| <i>Shckorbatov et al (2010) [76]</i>          | <i>Ukraine</i>   | 36.7  | 0.1      |      | 2   |
| <i>Shiina et al (2014) [77]</i>               | <i>Japan</i>     | 60    | 10       |      | 0   |
| <i>Soghomonyan and Trchounian (2013) [78]</i> | <i>Armenia</i>   | 51.8  | 0.6      |      | 4   |
| <i>Tadevosyan et al (2008) [79]</i>           | <i>Armenia</i>   | 52    | 0.6      |      | 6   |
| <i>Torgomyan (2011) [80]</i>                  | <i>Armenia</i>   | 73    | 0.6      |      | 8   |
| <i>Torgomyan et al (2012) [81]</i>            | <i>Armenia</i>   | 52    | 0.6      |      | 30  |
| <i>Torgomyan et al (2012) [82]</i>            | <i>Armenia</i>   | 53    | 0.6      |      | 18  |
| <i>Volkova et al (2014) [83]</i>              | <i>Ukraine</i>   | 42.25 | 0.3      |      | 2   |
| <i>Yaekashiwa et al (2017) [84]</i>           | <i>Japan</i>     | 70    | 0.01     |      | 0   |
| <i>Zeni et al (2007) [85]</i>                 | <i>Italy</i>     | 130   | 2.3      | 2    | 0   |
| <i>Zhadobov et al (2005) [86]</i>             | <i>France</i>    | 60    | 2.7      |      | 0   |
| <i>Zhadobov et al (2007) [87]</i>             | <i>France</i>    | 60    | 5.4      |      | 0   |
| <i>Zhadobov et al (2009) [88]</i>             | <i>France</i>    | 60.42 | 10       | 20   | 0   |

### References of included studies

1. Badzhinyan, SA, Sayadyan, AB, Sarkisyan, NK, Grigoryan, R.M. and Gasparyan, GG. Lethal effect of electromagnetic radiation of the millimeter wavelength range on cell cultures of chicken embryo. Dokl Biochem Biophys 2001; 377:94-5.
2. Bellossi A, Dubost G, Moulinoux JP, Himdi M, Ruelloux M, Rocher C. Biological effects of millimeter wave irradiation on mice-preliminary results. IEEE Trans on Microw Theory Tech 2000; 48(11):2104-2110.
3. Belyaev IY, Kravchenko VG. Resonance effect of low-intensity millimeter waves on the chromatin conformational state of rat thymocytes. Z Naturforsch 1994; 49(5-6):352-8.
4. Belyaev IY, Alipov YD, Shcheglov VS, Lystsov VN. Resonance effect of microwaves on the genome conformational state of E. coli cells. Z NaturforschC 1992; 47(7-8):621-7.

5. Belyaev I, Alipov YD, Shcheglov VS. 1992. Chromosome DNA as a target of resonant interaction between Escherichia coli cells and low-intensity millimeter waves. *Electro Magnetobiol* 11(2):97-108.
6. Belyaev IY, Shcheglov VS, Alipov YD. Selection rules on helicity during discrete transitions of the genome conformational state in intact and X-rayed cells of E. coli in millimeter range of electromagnetic field. *Charge and Field Effects in Biosystems* 1992; 3:115-126.
7. Belyaev IY, Alipov YD, Polunin VA, Shcheglov VS. Evidence for dependence of resonant frequency of millimeter wave interaction with Escherichia coli K12 cells on haploid genome length. *Electro Magnetobiol* 1993; 12(1):39-49.
8. Belyaev IY, Shcheglov VS, Alipov YD, Radko SP. Regularities of separate and combined effects of circularly polarized millimeter waves on E. coli cells at different phases of culture growth. *Bioelectrochem Bioenerg* 1993; 31(1):49-63.
9. Belyaev IY, Alipov YD, Shcheglov VS, Polunin VA, Aizenberg OA. Cooperative response of Escherichia coli cells to the resonance effect of millimeter waves at super low intensity. *Electro Magnetobiol* 1994; 13(1):53-66.
10. Belyaev IY, Shcheglov VS, Alipov YD, Polunin VA. Resonance effect of millimeter waves in the power range from 10<sup>-19</sup> to 3×10<sup>-3</sup> W/cm<sup>2</sup> on Escherichia coli cells at different concentrations. *Bioelectromagnetics* 1996; 17(4):312-21.
11. Beneduci A. Evaluation of the potential in vitro antiproliferative effects of millimeter waves at some therapeutic frequencies on RPMI 7932 human skin malignant melanoma cells. *Cell Biochem Biophys* 2009; 1;55(1):25-32.
12. Beneduci A, Chidichimo G, Tripepi S, Perrotte E. Frequency and Irradiation Time-dependant Antiproliferative Effect of Low-power Millimeter Waves on RPMI 7932 Human Melanoma Cell Line. *Anticancer Res* 2005; 25(2A):1023-1028.
13. Beneduci A, Chidichimo G, Tripepi S, Perrotta E, Cufone F. Antiproliferative effect of millimeter radiation on human erythromyeloid leukemia cell line K562 in culture: Ultrastructural-and metabolic-induced changes. *Bioelectrochemistry* 2007; 70(2):214-20.
14. Beneduci A, Filippelli L, Cosentino K, Calabrese ML, Massa R, Chidichimo G. 2012. Microwave induced shift of the main phase transition in phosphatidylcholine membranes. *Bioelectrochemistry* 2012; 1;84:18-24.
15. Beneduci A, Cosentino K, Chidichimo G. Millimeter wave radiations affect membrane hydration in phosphatidylcholine vesicles. *Materials* 2013; 6(7):2701-12.
16. Beneduci A, Cosentino K, Romeo S, Massa R, Chidichimo G. Effect of millimetre waves on phosphatidylcholine membrane models: a non-thermal mechanism of interaction. *Soft Matter* 2014; 10(30):5559-67.
17. Chen Q, Zeng QL, Lu DQ, Chiang H. Millimeter wave exposure reverses TPA suppression of gap junction intercellular communication in HaCaT human keratinocytes. *Bioelectromagnetics* 2004; 25(1):1-4.
18. Cohen I, Cahan R, Shani G, Cohen E, Abramovich A. Effect of 99 GHz continuous millimeter wave electro-magnetic radiation on E. coli viability and metabolic activity. *Int J Radiat Biol* 2010; 86(5):390-9.
19. Cosentino K, Beneduci A, Ramundo-Orlando A, Chidichimo G. The influence of millimeter waves on the physical properties of large and giant unilamellar vesicles. *J Biol Phys* 2013; 39(3):395-410.

20. Crouzier D, Perrin A, Torres G, Dabouis V, Debouzy JC. Pulsed electromagnetic field at 9.71 GHz increase free radical production in yeast (*Saccharomyces cerevisiae*). *Patho Biol* 2009; 57(3):245-251.
21. D'Agostino S, Della Monica C, Palizzi E, Di Pietrantonio F, Benetti M, Cannatà D et al. Extremely high frequency electromagnetic fields facilitate electrical signal propagation by increasing transmembrane potassium efflux in an artificial axon model. *Scientific Reports* 2018; 8(1):9299.
22. De Amicis A, Sanctis SD, Cristofaro SD et al. Biological effects of *in vitro* THz radiation exposure in human foetal fibroblasts. *Mutat Res Genet Toxicol Environ Mutagen* 2015; 793:150–60.
23. Deghoyan A, Heqimyan A, Nikoghosyan A, Dadasyan E, Ayrapetyan S. Cell bathing medium as a target for non thermal effect of millimeter waves. *Electromag Biol Med* 2012; 31(2):132-42.
24. Di Donato L, Cataldo M, Stano P, Massa R, Ramundo-Orlando A. Permeability changes of cationic liposomes loaded with carbonic anhydrase induced by millimeter waves radiation. *Radiat Res* 2012; 178(5):437-46.
25. Franchini V, Regalbuto E, De Amicis A, De Sanctis S, Di Cristofaro S, Coluzzi E et al. Genotoxic effects in human fibroblasts exposed to microwave radiation. *Health Phys*; 2018 115(1):126-39.
26. Furia L, Hill DW, Gandhi OMP. Effect of millimeter-wave irradiation on growth of *Saccharomyces cerevisiae*. *IEEE Trans Biom Eng* 1986; (11):993-9.
27. Gandhi OP, Haggmann MJ, Hill DW, Partlow LM, Bush L. Millimeter wave absorption spectra of biological samples. *Bioelectromagnetics* 1980; 1(3):285-98.
28. Gapeyev AB, Lukyanova NA. Pulse-modulated extremely high-frequency electromagnetic radiation protects cellular DNA from the damaging effects of physical and chemical factors *in vitro*. *Biophys* 2015; 60(5):732-738.
29. Gapeyev AB, Safronova VG, Chemeris NK, Fesenko EE. Inhibition of the production of reactive oxygen species in mouse peritoneal neutrophils by millimeter wave radiation in the near and far field zones of the radiator. *Bioelectrochemand Bioenerg* 1997; 43(2):217-20.
30. Gapeyev AB, Yakushina VS, Chemeris NK, Fesenko EE. Modification of production of reactive oxygen species in mouse peritoneal neutrophils on exposure to low-intensity modulated millimeter wave radiation. *Bioelectrochem Bioenerg* 1998; 46(2):267-72.
31. Gapeyev AB, Kulagina TP, Aripovsky AV, Chemeris NK. The role of fatty acids in anti-inflammatory effects of low-intensity extremely high-frequency electromagnetic radiation. *Bioelectromagnetics* 2011; 32(5):388-95.
32. Gapeyev AB, Kulagina TP, Aripovsky AV. Exposure of tumor-bearing mice to extremely high-frequency electromagnetic radiation modifies the composition of fatty acids in thymocytes and tumor tissue. *Int J Radiat Biol* 2013; 89(8):602-10.
33. Gapeyev A, Lukyanova N, Gudkov S. Hydrogen peroxide induced by modulated electromagnetic radiation protects the cells from DNA damage. *Open Life Sci* 2014; 9(10):915-21.

34. Garaj-Vrhovac V, Horvat D, Koren Z. The relationship between colony-forming ability, chromosome aberrations and incidence of micronuclei in V79 Chinese hamster cells exposed to microwave radiation. *Mutat Res Letters* 1991; 263(3):143-9.
35. Garaj-Vrhovac V, Fučić A, Horvat D. The correlation between the frequency of micronuclei and specific chromosome aberrations in human lymphocytes exposed to microwave radiation *in vitro*. *Mutat Res Letters* 1992; 281(3):181-6.
36. Geletyuk VI, Kazachenko VN, Chemeris NK, Fesenko EE. Dual effects of microwaves on single Ca<sup>2+</sup>-activated K<sup>+</sup> channels in cultured kidney cells Vero. *FEBS letters* 1995; 359(1):85-8.
37. Gos P, Eicher B, Kohli J, Heyer WD. Extremely high frequency electromagnetic fields at low power density do not affect the division of exponential phase *Saccharomyces cerevisiae* cells. *Bioelectromagnetics* 1997; 18(2):142-55.
38. Grundler, W. and Keilmann, F. Sharp resonances in yeast growth prove nonthermal sensitivity to microwaves. *Phys Rev letters* 1983; 51(13): 1214.
39. Hintzsche H, Jastrow C, Kleine-Ostmann T. Terahertz radiation induces spindle disturbances in human-hamster hybrid cells. *Radiat Res* 2011; 175:569–74.
40. Hintzsche H, Jastrow C, Kleine-Ostmann T, Kärst U, Schrader T, Stopper H. Terahertz electromagnetic fields (0.106 THz) do not induce manifest genomic damage *in vitro*. *PloS One* 2012; 7(9).
41. Homenko A, Kapilevich B, Kornstein R, Firer MA. Effects of 100 GHz radiation on alkaline phosphatase activity and antigen–antibody interaction. *Bioelectromagnetics* 2009; 30(3):167-75.
42. Hovnanyan K, Kalantaryan V, Trchounian A. The distinguishing effects of low-intensity electromagnetic radiation of different extremely high frequencies on *Enterococcus hirae*: growth rate inhibition and scanning electron microscopy analysis. *Letters in Appl microbiol* 2017; 65(3):220-5.
43. Kesari KK, Behari J. Microwave exposure affecting reproductive system in male rats. *Appl biochem and biotechnol* 2010; 162(2):416-428.
44. Kesari KK, Behari J. Fifty-gigahertz microwave exposure effect of radiations on rat brain. *Appl biochem and biotechnol* 2009; 158(1):126.
45. Korenstein-Ilan A, Barbul A, Hasin P et al. Terahertz radiation increases genomic instability in human lymphocytes. *Radiat Res* 2008; 170:224–34.
46. Koyama S, Narita E, Shimizu Y, Suzuki Y, Shiina T, Taki M, et al. Effects of long-term exposure to 60 GHz millimeter-wavelength radiation on the genotoxicity and heat shock protein (Hsp) expression of cells derived from human eye. *Int J Environ Res public health* 2016; 13(8):802.
47. Koyama S, Narita E, Suzuki Y, Shiina T, Taki M, Shinohara N et al. Long-term exposure to a 40-GHz electromagnetic field does not affect genotoxicity or heat shock protein expression in HCE-T or SRA01/04 cells. *J Radiat Res* 2019; 60(4):417-23.

48. Kumar S, Kesari KK, Behari J. Evaluation of genotoxic effects in male Wistar rats following microwave exposure. *Indian J Exp Biol* 2010; 48(6):586-92.
49. Kumar S, Kesari KK, Behari J. Influence of microwave exposure on fertility of male rats. *Fertility and sterility* 2011; 95(4):1500-1502.
50. Le Quément C, Nicolas Nicolaz C, Zhadobov M, Desmots F, Sauleau R, Aubry M et al. Whole-genome expression analysis in primary human keratinocyte cell cultures exposed to 60 GHz radiation. *Bioelectromagnetics* 2012; 33(2):147-158.
51. Lukashovsky KV, Belyaev IY. Switching of prophage lambda genes in *Escherichia coli* by millimetre waves. *Med Sci Res* 1990; 18(24):955-7.
52. Minasyan SM, Grigoryan GY, Saakyan SG, Akhmyan AA, Kalantaryan VP. Effects of the action of microwave-frequency electromagnetic radiation on the spike activity of neurons in the supraoptic nucleus of the hypothalamus in rats. *Neurosci Behav Physiol* 2007; 37(2):175-80.
53. Müller J, Hädeler KP, Müller V, Waldmann J, Landstorfer FM, Wisniewski R et al. Influence of low power cm-/mm-microwaves on cardiovascular function. *Int J Environ Health Res* 2004; 14(5):331-41.
54. Munemori J, Ikeda T. Effects of low-level microwave radiation on the eye of the crayfish. *Med Biol Eng Compu* 1982; 20(1):84-8.
55. Munemori J, Ikeda T. Biological effects of X-band microwave radiation on the eye of the crayfish. *Med Biol Eng Compu* 1984; 22(3):263-7.
56. Nicolaz CN, Zhadobov M, Desmots F, Ansart A, Sauleau R, Thouroude D, et al. Study of narrow band millimeter-wave potential interactions with endoplasmic reticulum stress sensor genes. *Bioelectromagnetics* 2008; 30(5):365-73.
57. Nicolaz CN, Zhadobov M, Desmots F, Sauleau R, Thouroude D, Michel D et al. Absence of direct effect of low-power millimeter-wave radiation at 60.4 GHz on endoplasmic reticulum stress. *Cell Biol Toxicol* 2009; 25(5):471-8.
58. Olchowik G, Maj JG. Inhibitory action of microwave radiation on gamma-glutamyl transpeptidase activity in liver of rats treated with hydrocortisone. *Folia Histochemica Et Cytobiologica* 2000; 38(4):189-91.
59. Pakhomova ON, Pakhomov AG, Akyel Y. Effect of millimeter waves on UV-induced recombination and mutagenesis in yeast. *Bioelectrochem Bioenerg* 1997; 43(2):227-32.
60. Pakhomov AG, Prol HK, Mathur SP, Akyel Y, Campbell CB. Frequency-specific effects of millimeter-wavelength electromagnetic radiation in isolated nerve. *Electro Magnetobiol* 1997; 16(1):43-57.
61. Pakhomov AG, Prol HK, Mathur SP, Akyel Y, Campbell CB. Search for frequency-specific effects of millimeter-wave radiation on isolated nerve function. *Bioelectromagnetics* 1997; 18(4):324-34.
62. Pakhomov AG, Prol HK, Mathur SP, Akyel Y, Campbell CB. Role of field intensity in the biological effectiveness of millimeter waves at a resonance frequency. *Bioelectrochem Bioenerg* 1997; 43(1):27-33.

63. Paulraj R, Behari J. Single strand DNA breaks in rat brain cells exposed to microwave radiation. *Mutat Res* 2006; 596(1-2):76-80.
64. Pikov V, Arakaki X, Harrington M, Fraser SE, Siegel PH. Modulation of neuronal activity and plasma membrane properties with low-power millimeter waves in organotypic cortical slices. *J Neural Eng* 2010; 7(4):045003.
65. Pikov V, Siegel PH. Millimeter wave-induced changes in membrane properties of leech Retzius neurons. *Photonic Therapeutics and Diagnostics* 2011; 7883:56-1
66. Ramundo-Orlando A, Longo G, Cappelli M, Girasole M, Tarricone L, Beneduci A et al. The response of giant phospholipid vesicles to millimeter waves radiation. *Biochem Biophys Acta* 2009; 1788(7):1497-1507.
67. Rojavin MA, Ziskin MC. Effect of millimeter waves on survival of UVC-exposed *Escherichia coli*. *Bioelectromagnetics* 1995; 16(3):188-96.
68. Romanenko S, Siegel PH, Wagenaar DA, Pikov V. Effects of millimeter wave irradiation and equivalent thermal heating on the activity of individual neurons in the leech ganglion. *J Neurophysiol* 2014; 112(10):2423-31.
69. Rotkovská D, Moc J, Kautská J, Bartonícková A, Keprtová J, Hofer M. Evaluation of the biological effects of police radar RAMER 7F. *Environ Health Perspect* 1993; 101(2):134-6.
70. Safronova VG, Gabdoulkhakova AG, Santalov BF. Immunomodulating action of low intensity millimeter waves on primed neutrophils. *Bioelectromagnetics* 2002; 23(8):599-606.
71. Sarapultseva EI, Igolkina JV, Tikhonov VN, Dubrova YE. The in vivo effects of low-intensity radiofrequency fields on the motor activity of protozoa. *Int J Radiat Biol* 2014; 90(3):262-7.
72. Shcheglov VS, Belyaev I, Alipov YD, Ushakov VL. Power-dependent rearrangement in the spectrum of resonance effect of millimeter waves on the genome conformational state of *Escherichia Coli* cells. *Electro Magnetobiol* 1997; 16(1):69-82.
73. Shcheglov VS, Alipov ED, Belyaev I. Cell-to-cell communication in response of *E. coli* cells at different phases of growth to low-intensity microwaves. *Biochimica et biophysica acta (BBA)-general subjects* 2002; 1572(1):101-6.
74. Shckorbatov YG, Grigoryeva NN, Shakhbazov VG, Grabina VA, Bogoslavsky AM. Microwave irradiation influences on the state of human cell nuclei. *Bioelectromagnetics*; 1998 19(7):414-9.
75. Shckorbatov YG, Shakhbazov VG, Navrotskaya VV, Grabina VA, Sirenko SP, Fisun AI et al. Application of intracellular microelectrophoresis to analysis of the influence of the low-level microwave radiation on electrokinetic properties of nuclei in human epithelial cells. *Electrophoresis* 2002; 23(13):2074-2079.
76. Shckorbatov YG, Pasiuga VN, Goncharuk EI, Petrenko TP, Grabina VA, Kolchigin NN et al. Effects of differently polarized microwave radiation on the microscopic structure of the nuclei in human fibroblasts. *J Zhejiang Unive Sci B* 2010; 11(10):801-805.



77. Shiina T, Suzuki Y, Kasai Y, Inami Y, Taki M, Wake K. Effect of two-times 24 hour exposures to 60 GHz millimeter-waves on neurite outgrowth in PC12VG cells in consideration of polarization. 2014. IEEE Int Sympo Electromag Compat 2014; 166-169.
78. Soghomonyan D, Trchounian A. Comparable effects of low-intensity electromagnetic irradiation at the frequency of 51.8 and 53 GHz and antibiotic ceftazidime on *Lactobacillus acidophilus* growth and survival. *Cell Biochem Biophys* 2013; 67(3):829-35.
79. Tadevosyan H, Kalantaryan V, Trchounian A. Extremely high frequency electromagnetic radiation enforces bacterial effects of inhibitors and antibiotics. *Cell Biochem Biophys* 2008; 51(2-3):97-103.
80. Torgomyan H, Kalantaryan V, Trchounian A. Low intensity electromagnetic irradiation with 70.6 and 73 GHz frequencies affects *Escherichia coli* growth and changes water properties. *Cell Biochem Biophys* 2011; 60(3):275-81.
81. Torgomyan H, Hovnanyan K, Trchounian A. *Escherichia coli* growth changes by the mediated effects after low-intensity electromagnetic irradiation of extremely high frequencies. *Cell Biochem Biophys* 2012; 65(3):445-54.
82. Torgomyan H, Ohanyan V, Blbulyan S, Kalantaryan V, Trchounian A. Electromagnetic irradiation of *Enterococcus hirae* at low-intensity 51.8-and 53.0-GHz frequencies: changes in bacterial cell membrane properties and enhanced antibiotics effects. *FEMS microbiol letters* 2012; 329(2):131-7.
83. Volkova NA, Pavlovich EV, Gapon AA, Nikolov OT. Effects of millimeter-wave electromagnetic exposure on the morphology and function of human cryopreserved spermatozoa. *Bull Exp Biol Med* 2014; 157(5):574-6.
84. Yaekashiwa N, Otsuki S, Hayashi SI, Kawase K. 2017. Investigation of the non-thermal effects of exposing cells to 70–300 GHz irradiation using a widely tunable source. *J Radiat Res* 59(2):116-21.
85. Zeni O, Gallerano GP, Perrotta A, Romano M, Sannino A, Sarti M et al. Cytogenetic observations in human peripheral blood leukocytes following in vitro exposure to THz radiation: a pilot study. *Health Phys* 2007; 92(4):349-57.
86. Zhadobov M, Sauleau R, Le Coq L, Thouroude D, Orlov I, Michel D et al. 60 GHz electromagnetic fields do not activate stress-sensitive gene expression. *IEEE 11th Int Sympo on Antenna Technol and appl electromag* 2005; 1-4.
87. Zhadobov M, Sauleau R, Le Coq L, Debure L, Thouroude D, Michel D et al. Low-power millimeter wave radiations do not alter stress-sensitive gene expression of chaperone proteins. *Bioelectromagnetics* 2007; 28(3):188-96.
88. Zhadobov M, Nicolaz CN, Sauleau R, Desmots F, Thouroude D, Michel D et al. Evaluation of the potential biological effects of the 60-GHz millimeter waves upon human cells. *IEEE Trans Antennas Propag* 2009; 57(10):2949-56.

### **References of excluded studies**

The reasons for exclusion of these references is summarised in the main paper.

1. Belyaev IY, Shcheglov VS, Alipov YD. Existence of selection rules on helicity during discrete transitions of the genome conformational state of *E. coli* cells exposed to low-level millimetre radiation. *Bioelectrochem Bioenerg* 1992; 27(3):405-11.
2. Beneduci A, Chidichimo G, Tripepi S, Perrotte E. Transmission electron microscopy study of the effects produced by wide-band low-power millimeter waves on MCF-7 human breast cancer cells in culture. *Anticancer Res* 2005; 25(2A):1009-13.
3. Bush LG, Hill DW, Riaz A, Stensaas LJ, Partlow LM, Gandhi OP. Effects of millimeter-wave radiation on monolayer cell cultures. III. A search for frequency-specific athermal biological effects on protein synthesis. *Bioelectromagnetics* 1981; 2(2):151-9.
4. Chidichimo G, Beneduci A, Nicoletta M, Critelli M, De RR, Tkatchenko Y, Abonante S, Tripepi S, Perrotta E. Selective inhibition of tumoral cells growth by low power millimeter waves. *Anticancer Res* 2002; 22(3):1681-8.
5. Gapeyev AB, Aripovsky AV, Kulagina TP. Modifying effects of low-intensity extremely high-frequency electromagnetic radiation on content and composition of fatty acids in thymus of mice exposed to X-rays. *Int J Radiat Biol* 2015; 91(3):277-85.
6. Grundler W, Keilmann F. 1977. Nonthermal effects of millimeter microwaves on yeast growth. *Z Naturforsch* 33(1-2):15-22.
7. Kalantaryan VP, Vardevanyan PO, Babayan YS, Gevorgyan ES, Hakobyan SN, Antonyan AP. 2010. Influence of low intensity coherent electromagnetic millimeter radiation (EMR) on aqua solution of DNA. *Progress in Electromag Res* 13:1-9.
8. Khizhnyak EP, Ziskin MC. 1996. Temperature oscillations in liquid media caused by continuous (nonmodulated) millimeter wavelength electromagnetic irradiation. *Bioelectromagnetics* 17(3):223-9.
9. Manikowska E, Luciani JM, Servantie B, Czerski P, Obrenovitch J, Stahl A. 1979. Effects of 9.4 GHz microwave exposure on meiosis in mice. *Experientia* 35(3):388-90.
10. Romanenko S, Siegel PH, Pikov V. 2013. Microdosimetry and physiological effects of millimeter wave irradiation in isolated neural ganglion preparation. *IEEE 2013 International kharkov symposium on physics and engineering of microwaves, millimeter and submillimeter waves. IEEE* 13:512-516.
11. Shckorbatov YG, Pasiuga VN, Kolchigin NN, Grabina VA, Batrakov DO, Kalashnikov VV, Ivanchenko DD, Bykov VN. 2009. The influence of differently polarised microwave radiation on chromatin in human cells. *Int J Radiat Biol* 85(4):322-329.
12. Smolyanskaya AZ, Vilenskaya RL. 1974. Effects of millimeter-band electromagnetic radiation on the functional activity of certain genetic elements of bacterial cells. *Soviet Phys USPEKHI* 16(4): 571.
13. Stensaas LJ, Partlow LM, Bush LG, Iversen PL, Hill DW, Haggmann MJ, Gandhi OP. 1981. Effects of millimeter-wave radiation on monolayer cell cultures. II. Scanning and transmission electron microscopy. *Bioelectromagnetics* 2(2):141-50.
14. Subbotina TI, Tereshkina OV, Khadartsev AA, Yashin AA. 2006. Effect of low-intensity extremely high frequency radiation on reproductive function in Wistar rats. *Bull Exp Biol Med* 142(2):189-90.

15. Torgomyan H, Kalantaryan V, Trchounian A. 2011. Low intensity electromagnetic irradiation with 70.6 and 73 GHz frequencies affects Escherichia coli growth and changes water properties. *Cell Biochem Biophys* 60(3):275-81.
16. Webb SJ, Booth AD. 1969. Absorption of microwaves by microorganisms. *Nature* 222(5199):1199-200.
17. Webb SJ, Booth AD. 1971. Microwave absorption by normal and tumor cells. *Science* 1;174(4004):72-4.
18. Webb SJ, Dodds DD. 1968. Inhibition of bacterial cell growth by 136 GC microwaves. *Nature* 218(5139):374-5.
19. Zhadobov M, Sauleau R, Vié V, Himdi M, Le Coq L, Thouroude D. 2006. Interactions between 60-GHz millimeter waves and artificial biological membranes: dependence on radiation parameters. *IEEE Trans on micro theory and tech* 54(6):2534-42.
